# Supplementary material for: Comparative Efficacy of Clinical Interventions for Sacroiliac Joint Pain: Systematic Review and Network Meta-analysis With Preliminary Design of Treatment Algorithm
Source: PubMed Central journal article supplement — Neurospine. 2023 Sep 30;20(3):997–1010. doi: 10.14245/ns.2346586.293 (PMC10562251; doi:10.14245/ns.2346586.293), 2023-09-30
Supplement: ns-2346586-293-Supplementary-1.pdf [file ns-2346586-293-Supplementary-1.pdf]

## Search strategy:

**PubMed:** n=516; ("radiofrequency ablation" OR "radiofrequency neurotomy" OR "radiofrequency lesioning" OR "radiofrequency neurolysis" OR "radiofrequency ablation" OR "radiofrequency denervation" OR "injection" OR "joint fusion") AND (("sacroiliac" OR "SI Joint" OR "sacroiliac region" OR "pelvic girdle") AND ("sacroiliitis" OR "sacroiliac joint pathology" OR "sacroiliac pain" OR "sacroiliac syndrome" OR "sacroiliac joint disease" OR "back pain"))

The screenshot shows a PubMed search interface. The search bar contains the query: ("Radiofrequency Ablation" OR "Radiofrequency Neurotomy" OR "Radiofreq...). Below the search bar are buttons for "Advanced", "Create alert", "Create RSS", and "User Guide". Below the search bar are buttons for "Save", "Email", and "Send to". Below the search bar are buttons for "Sorted by: Best match" and "Display options". Below the search bar are buttons for "516 results", "Page 1 of 11", and navigation arrows.

**WoS:** n=521; TS= ("radiofrequency ablation" OR "radiofrequency neurotomy" OR "radiofrequency lesioning" OR "radiofrequency neurolysis" OR "radiofrequency ablation" OR "radiofrequency denervation" OR "injection" OR "joint fusion") AND TS= ("sacroiliac" OR "SI Joint" OR "sacroiliac region" OR "pelvic girdle") AND TS= ("sacroiliitis" OR "sacroiliac joint pathology" OR "sacroiliac pain" OR "sacroiliac syndrome" OR "sacroiliac joint disease" OR "back pain")

The screenshot shows a Web of Science search interface. The search bar contains the query: TS= ("Radiofrequency Ablation" OR "Radiofrequency Neurotomy" OR "Radiofrequency Lesioning" OR "Radio...). Below the search bar are buttons for "Analyze Results", "Citation Report", and "Create Alert". Below the search bar is a button for "Copy query link".

**Scopus:** n=842; TITLE-ABS-KEY ("radiofrequency ablation" OR "radiofrequency neurotomy" OR "radiofrequency lesioning" OR "radiofrequency neurolysis" OR "radiofrequency ablation" OR "radiofrequency denervation" OR "injection" OR "joint fusion") AND (TITLE-ABS-KEY ("sacroiliac" OR "SI Joint" OR "sacroiliac region" OR "pelvic girdle") AND TITLE-ABS-KEY ("sacroiliitis" OR "sacroiliac joint pathology" OR "sacroiliac pain" OR "sacroiliac syndrome" OR "sacroiliac joint disease" OR "back pain"))

The screenshot shows a Scopus search interface. The search bar contains the query: TITLE-ABS-KEY ("Radiofrequency Ablation" OR "Radiofrequency Neurotomy" OR "Radiofrequency Lesioning" OR "Radiofrequency Neurolysis" OR "Radiofrequency Denervation" OR "Injection" OR "Joint Fusion") AND (TITLE-ABS-KEY ("Sacroiliac" OR "SI Joint" OR "Sacroiliac Region" OR "Pelvic Girdle") AND TITLE-ABS-KEY ("Sacroiliitis" OR "Sacroiliac Joint Pathology" OR "Sacroiliac Pain" OR "Sacroiliac Syndrome" OR "Sacroiliac Joint Disease" OR "Back Pain")). Below the search bar are buttons for "Save search", "Set search alert", "Edit in advanced search", and "Analyze results". Below the search bar are buttons for "Documents", "Patents", and "Secondary documents". Below the search bar are buttons for "842 documents found". Below the search bar are buttons for "Filters", "Search within results", "Year", "Range", "Individual", "Show abstract", "View at Publisher", and "Related documents". Below the search bar are buttons for "1 Biportal Endoscopic Radiofrequency Ablation of the Sacroiliac Joint Complex in the Treatment of Chronic Low Back Pain: A Technical Note with 1-Year Follow-Up" and "2 Factors associated with hardware failure after lateral thoracolumbar fusions - A ten year case series".

# Cochrane: n=35;

|     |                                                       |        |              |
|-----|-------------------------------------------------------|--------|--------------|
| #1  | MeSH descriptor: [Sacroiliac Joint] explode all trees | MeSH   | 134          |
| #2  | (Sacroiliitis)                                        | S      | Limits 263   |
| #3  | (sacroiliac joint pathology)                          | S      | Limits 81    |
| #4  | (sacroiliac pain):ti,ab,kw                            | S      | Limits 548   |
| #5  | (sacroiliac syndrome):ti,ab,kw                        | S      | Limits 56    |
| #6  | (sacroiliac joint disease):ti,ab,kw                   | S      | Limits 251   |
| #7  | (back pain):ti,ab,kw                                  | S      | Limits 20188 |
| #8  | #2 or #3 or #4 or #5 or #6 or #7                      | Limits | 20652        |
| #9  | (radiofrequency ablation):ti,ab,kw                    | S      | Limits 3542  |
| #10 | (radiofrequency neurotomy):ti,ab,kw                   | S      | Limits 84    |
| #11 | (radiofrequency lesioning):ti,ab,kw                   | S      | Limits 53    |
| #12 | (radiofrequency neurolysis):ti,ab,kw                  | S      | Limits 43    |
| #13 | (radiofrequency ablation):ti,ab,kw                    | S      | Limits 3542  |
| #14 | (radiofrequency denervation):ti,ab,kw                 | S      | Limits 250   |
| #15 | (injection):ti,ab,kw                                  | S      | Limits 83164 |
| #16 | (joint fusion):ti,ab,kw                               | S      | Limits 470   |
| #17 | #9 or #10 or #11 or #12 or #13 or #14 or #15 or #16   | Limits | 87013        |
| #18 | #17 and #8 and #1                                     | Limits | 35           |

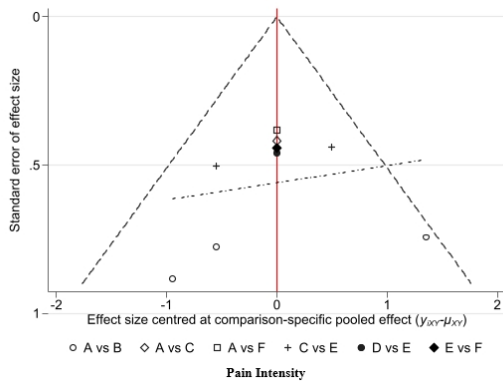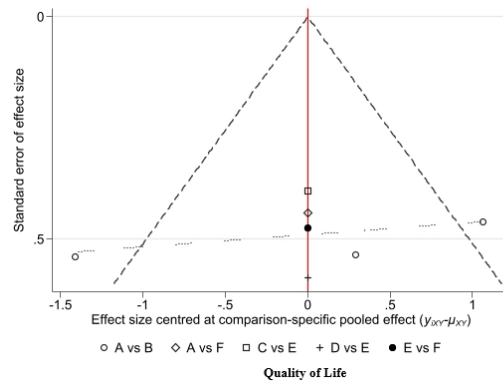

Comparison-adjusted funnel plot for the PI (A) and QoL (B); (A) conservative therapy; (B) cooled radiofrequency; (C) thermal radiofrequency; (D) pulsed radiofrequency; (E) Injection; (F) Fusion.

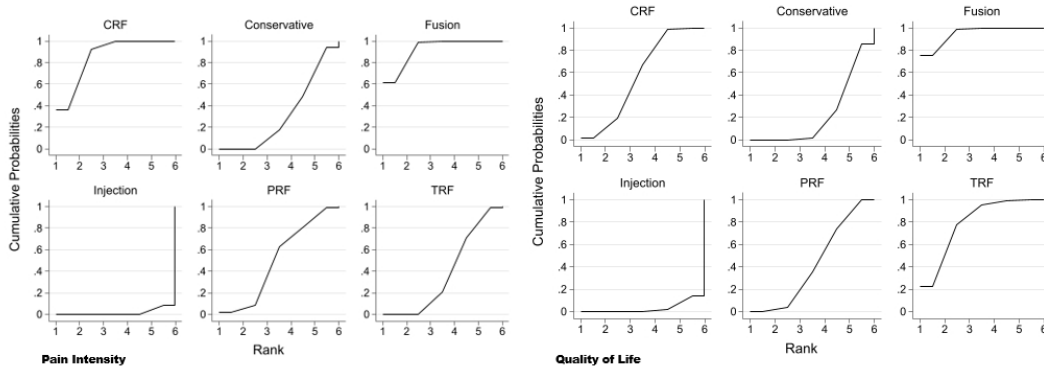

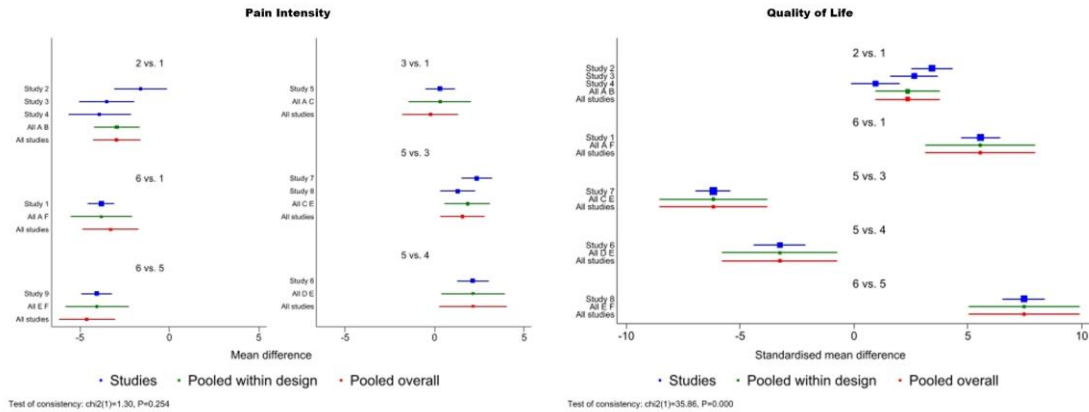

Fit side-splitting model to explore inconsistency. Upper is estimated in pain intensity model, lower is estimated in QoL model.

| Side  | Direct    | Indirect  | Difference | tau      |
|-------|-----------|-----------|------------|----------|
|       | Coef.     | Coef.     | Coef.      |          |
| A B   | .3        | -1.601221 | 1.901221   | .7832547 |
| A C   | -3.81     | -1.907796 | -1.902204  | .7834694 |
| C E   | 1.843356  | -.0587681 | 1.902124   | .7834405 |
| D E * | 2.134     | 2.632753  | -.4987527  | .8438026 |
| E F   | -4.049997 | -5.952108 | 1.902111   | .7835084 |

\* Warning: all the evidence about these contrasts comes from the trials which directly compare them. See help file for more information.

| Side  | Direct    | Indirect  | Difference | tau      |
|-------|-----------|-----------|------------|----------|
|       | Coef.     | Coef.     | Coef.      |          |
| A B   |           |           |            |          |
| A F * | 5.550819  | 4.113438  | 1.437382   | 1.158177 |
| C E * | -6.177954 | -3.476104 | -2.70185   | 1.156545 |
| D E * | -3.25943  | -3.844906 | .5854764   | 1.156557 |
| E F * | 7.461691  | 8.656218  | -1.194527  | 1.158179 |

\* Warning: all the evidence about these contrasts comes from the trials which directly compare them. See help file for more information.

To evaluate the inconsistency separately in each closed loop of networks of interventions using loop-specific approach.

Evaluation of inconsistency using loop-specific heterogeneity estimates:

| Loop    | IF    | seIF  | z_value | p_value | CI_95        | Loop_Heterog_tau2 |
|---------|-------|-------|---------|---------|--------------|-------------------|
| A-C-E-F | 1.954 | 0.791 | 2.470   | 0.014   | (0.40, 3.50) | 0.000             |

# Sensitivity analysis

## PI

| Side  | Direct<br>Coef. | Std. Err. | Indirect<br>Coef. | Std. Err. | Difference<br>Coef. | Std. Err. | P> z  | tau      |
|-------|-----------------|-----------|-------------------|-----------|---------------------|-----------|-------|----------|
| A B   | .               | .         | .                 | .         | .                   | .         | .     | .        |
| A C   | -1.4            | 1.750866  | -1.601211         | 1.410703  | .2012115            | 2.24847   | 0.929 | .7832549 |
| A F   | -3.81           | .8717024  | -3.602702         | 2.06998   | -.207298            | 2.246037  | 0.926 | .7834429 |
| C E   | 1.843347        | .6466347  | 1.64089           | 2.154013  | .202457             | 2.248997  | 0.928 | .7834368 |
| D E * | 2.134           | .7857113  | .5934485          | 79.13127  | 1.540552            | 79.13568  | 0.984 | .637807  |
| E F   | -4.049995       | .90345    | -4.256505         | 2.056818  | .2065101            | 2.24649   | 0.927 | .7834837 |

| _Comparison | _Effect_Size | _Standard_Error | _LCI      | _UCI      | _LPrI     | _UPrI     |
|-------------|--------------|-----------------|-----------|-----------|-----------|-----------|
| CRF vs CON  | -2.939612    | .6476873        | -4.209056 | -1.670168 | -4.209056 | -1.670168 |
| TRF vs CON  | -1.397544    | 1.747861        | -4.823288 | 2.028201  | -4.823288 | 2.028201  |
| PRF vs CON  | -1.687775    | 2.071977        | -5.748776 | 2.373226  | -5.748776 | 2.373226  |
| IJ vs CON   | -.2056536    | 2.246486        | -4.608685 | 4.197378  | -4.608685 | 4.197378  |
| FUS vs CON  | .4460539     | 1.863001        | -3.205361 | 4.097469  | -3.205361 | 4.097469  |
| TRF vs CRF  | 1.542068     | 1.864024        | -2.111351 | 5.195488  | -2.111351 | 5.195488  |
| PRF vs CRF  | 1.251837     | 2.170485        | -3.002236 | 5.50591   | -3.002236 | 5.50591   |
| IJ vs CRF   | 3.385666     | 1.971972        | -.4793285 | 7.25066   | -.4793285 | 7.25066   |
| FUS vs CRF  | -.8701241    | 1.085977        | -2.998599 | 1.258351  | -2.998599 | 1.258351  |
| PRF vs TRF  | -.2902311    | 1.11446         | -2.474532 | 1.894069  | -2.474532 | 1.894069  |
| IJ vs TRF   | 1.843597     | .6465423        | .5763978  | 3.110797  | .5763978  | 3.110797  |
| FUS vs TRF  | -2.412193    | 1.953161        | -6.240317 | 1.415932  | -6.240317 | 1.415932  |
| IJ vs PRF   | 2.133829     | .9078769        | .3544226  | 3.913235  | .3544226  | 3.913235  |
| FUS vs PRF  | -2.121961    | 2.24787         | -6.527706 | 2.283784  | -6.527706 | 2.283784  |
| FUS vs IJ   | -4.25579     | 2.056844        | -8.287128 | -.2244506 | -8.287128 | -.2244506 |

| Treatment    | SUCRA | PrBest | MeanRank |
|--------------|-------|--------|----------|
| Conservative | 20.2  | 0.0    | 5.0      |
| CooledRF     | 73.5  | 16.0   | 2.3      |
| ThermalRF    | 49.9  | 3.4    | 3.5      |
| PulsedRF     | 57.4  | 14.0   | 3.1      |
| Injection    | 9.3   | 0.0    | 5.5      |
| Fusion       | 89.7  | 66.6   | 1.5      |



# QoL

| Side  | Direct<br>Coef. | Std. Err. | Indirect<br>Coef. | Std. Err. | Difference<br>Coef. | Std. Err. | P> z  | tau      |
|-------|-----------------|-----------|-------------------|-----------|---------------------|-----------|-------|----------|
| A B   | .               | .         | .                 | .         | .                   | .         | .     | .        |
| A F * | -20.1           | 3.205641  | -20.43322         | 78.59441  | .3332204            | 78.65975  | 0.997 | .0000612 |
| C E * | 11              | .4970693  | 9.95634           | 196.5469  | 1.04366             | 196.5476  | 0.996 | 4.60e-07 |
| D E * | 5.62            | 1.551322  | 10.6032           | 268.412   | -4.983196           | 268.4174  | 0.985 | 1.25e-07 |
| E F * | -25.40001       | 3.302851  | -24.96852         | 79.0447   | -.4314869           | 79.11361  | 0.996 | .0000559 |

| _Comparison | _Effect_Size | _Standard_Error | _LCI      | _UCI      | _LPrI     | _UPrI     |
|-------------|--------------|-----------------|-----------|-----------|-----------|-----------|
| CRF vs CON  | -12.42994    | 3.728275        | -19.73723 | -5.122656 | -19.73723 | -5.122656 |
| TRF vs CON  | -5.70132     | 4.621638        | -14.75956 | 3.356925  | -14.75956 | 3.356925  |
| PRF vs CON  | -.3215104    | 4.849369        | -9.826098 | 9.183078  | -9.826098 | 9.183078  |
| IJ vs CON   | 5.298674     | 4.594889        | -3.707143 | 14.30449  | -3.707143 | 14.30449  |
| FUS vs CON  | -20.10055    | 3.20298         | -26.37828 | -13.82283 | -26.37828 | -13.82283 |
| TRF vs CRF  | 6.728621     | 5.937977        | -4.9096   | 18.36684  | -4.9096   | 18.36684  |
| PRF vs CRF  | 12.10843     | 6.116896        | .1195357  | 24.09733  | .1195357  | 24.09733  |
| IJ vs CRF   | 17.72861     | 5.917182        | 6.131151  | 29.32608  | 6.131151  | 29.32608  |
| FUS vs CRF  | -7.670612    | 4.915192        | -17.30421 | 1.962987  | -17.30421 | 1.962987  |
| PRF vs TRF  | 5.379809     | 1.62898         | 2.187067  | 8.572553  | 2.187067  | 8.572553  |
| IJ vs TRF   | 10.99999     | .4970677        | 10.02576  | 11.97423  | 10.02576  | 11.97423  |
| FUS vs TRF  | -14.39923    | 3.33716         | -20.93995 | -7.858521 | -20.93995 | -7.858521 |
| IJ vs PRF   | 5.620184     | 1.55129         | 2.579711  | 8.660657  | 2.579711  | 8.660657  |
| FUS vs PRF  | -19.77904    | 3.646194        | -26.92545 | -12.63264 | -26.92545 | -12.63264 |
| FUS vs IJ   | -25.39923    | 3.299975        | -31.86706 | -18.93139 | -31.86706 | -18.93139 |

| Treatment    | SUCRA | PrBest | MeanRank |
|--------------|-------|--------|----------|
| Conservative | 29.0  | 0.0    | 4.6      |
| CooledRF     | 78.0  | 5.6    | 2.1      |
| ThermalRF    | 60.6  | 0.0    | 3.0      |
| PulsedRF     | 31.0  | 0.0    | 4.4      |
| Injection    | 2.5   | 0.0    | 5.9      |
| Fusion       | 98.9  | 94.4   | 1.1      |
